# Supplementary material
Source: PubMed Central journal article supplement (PMC4862435)
Supplement: supp_djv323_Supplementary_Materials.pdf [file supp_djv323_Supplementary_Materials.pdf]

**Supplementary Table 1. Primer sequences and PCR conditions. The first four assays are for bisulfite-pyrosequencing. The next four are for mutation analysis.**

| Gene                           | Step | Annealing Temp. (°C) | Sequence 5' to 3'                                                                                  | 5'-modified |
|--------------------------------|------|----------------------|----------------------------------------------------------------------------------------------------|-------------|
| SP140 (hg18, Chr2:230,798,573) | 1    | 58                   | AGTTAAGGGAGGAGGAGTAGAGTT<br>CCTTAACAAAAACAAATAACCCTATC                                             |             |
|                                | 2    | 60                   | AGTTAAGGGAGGAGGAGTAGAGTT<br>GGGACACCGCTGATCGTTTACCTTAACAAAAACAAATAACCCTATC<br>GGGACACCGCTGATCGTTTA | Biotin      |
|                                | S    |                      | GGAGGAGGAGTAGAGTTAGT                                                                               |             |
|                                | 1    | 56                   | GAATGATGGTTTGGTTTAGAATGT<br>TCAAATTCACTTCCCCCTAA                                                   |             |
| MCCC1 (hg18, Chr3:184,245,211) | 2    | 58                   | GAATGATGGTTTGGTTTAGAATGT<br>GGGACACCGCTGATCGTTTATCAAATTCACTTCCCCCTAA<br>GGGACACCGCTGATCGTTTA       | Biotin      |
|                                | S    |                      | AATTTTATTTGTTGGTTGTT                                                                               |             |
|                                | 1    | 58                   | TGTAAGGGTAGGAGGGGTTGA<br>TTCCCTCCACTCTTAAACTTTCT                                                   |             |

|                                       |   |    |                                              |               |
|---------------------------------------|---|----|----------------------------------------------|---------------|
| 139,803,373)                          |   |    | TGTAAGGGTAGGAGGGGTTGA                        |               |
|                                       | 2 | 60 | GGGACACCGCTGATCGTTTATCCCTCCACTCTTAAACTTTCT   |               |
|                                       |   |    | GGGACACCGCTGATCGTTTA                         | <b>Biotin</b> |
|                                       | S |    | GTTGTTTTTAGATTTATAT                          |               |
|                                       | 1 | 56 | AAGTTTTAAATTGGTAGGGGTTTT                     |               |
|                                       |   |    | AATATACCCAACCTTACCCTACTC                     |               |
| MTSS1 (hg18,<br>Chr8:125,683,079<br>) | 2 | 58 | AAGTTTTAAATTGGTAGGGGTTTT                     |               |
|                                       |   |    | GGGACACCGCTGATCGTTTAAATATACCCAACCTTACCCTACTC |               |
|                                       |   |    | GGGACACCGCTGATCGTTTA                         | <b>Biotin</b> |
|                                       | S |    | GGGGTTTTTTTTATTTTGA                          |               |
| IDH1 (R132)                           | 1 | 58 | TGCCAACATGACTTACTTGATCC                      |               |
|                                       |   |    | AATATCCCCCGGCTTGTGA                          | <b>Biotin</b> |
|                                       | S |    | TGATCCCCATAAGCAT                             |               |
| IDH2 (R140)                           | 1 | 58 | TAGGCGTGGGATGTTTTTG                          |               |
|                                       |   |    | CAGAGTTCAAGCTGAAGAAGATGT                     | <b>Biotin</b> |
|                                       | S |    | CCCCCAGGATGTTC                               |               |
| IDH2 (R172)                           | 1 | 58 | TGCCCAGGTCAGTGGATC                           |               |
|                                       |   |    | GGAGCCCATCATCTGCAA                           | <b>Biotin</b> |

|                      |          |           |                                              |               |
|----------------------|----------|-----------|----------------------------------------------|---------------|
|                      | <b>S</b> |           | <b>TCGCCATGGGCGTGC</b>                       |               |
|                      |          |           | <b>TGTGGTTAGACGGCTTCC</b>                    |               |
| <b>DNMT3A (R882)</b> | <b>1</b> | <b>58</b> | <b>GGGACACCGCTGATCGTTTAGAAGAGGTGGCGGATGA</b> |               |
|                      |          |           | <b>GGGACACCGCTGATCGTTA</b>                   | <b>Biotin</b> |
|                      | <b>S</b> |           | <b>TGACGTCTCCAACATGA</b>                     |               |

**Supplementary Table 2. Patient Characteristics for tet2-DMC-low and high defined by the clinically applicable thresholds\***

| <b>Characteristics</b>                       | <b>tet2-DMC-Low</b> | <b>tet2-DMC-High</b> | <b>P value</b> |
|----------------------------------------------|---------------------|----------------------|----------------|
| <b>Total number</b>                          | <b>67</b>           | <b>113</b>           |                |
| <b>Age, years</b>                            |                     |                      |                |
| <b>Mean</b>                                  | <b>51</b>           | <b>49</b>            | <b>0.66</b>    |
| <b>(Range)</b>                               | <b>(19-68)</b>      | <b>(17-73)</b>       |                |
| <b>Gender:</b>                               |                     |                      |                |
| <b>Male – no. (%)</b>                        | <b>30 (45)</b>      | <b>55 (49)</b>       | <b>0.65</b>    |
| <b>Bone marrow blasts at diagnosis</b>       |                     |                      | <b>0.57</b>    |
| <b>Mean</b>                                  | <b>53</b>           | <b>55</b>            |                |
| <b>(Range)</b>                               | <b>(7-94)</b>       | <b>(16-99)</b>       |                |
| <b>WBC at diagnosis (*10<sup>3</sup>/uL)</b> |                     |                      |                |
| <b>Mean</b>                                  | <b>21</b>           | <b>26</b>            | <b>0.96</b>    |
| <b>(Range)</b>                               | <b>(1-129)</b>      | <b>(1-228)</b>       |                |
| <b>Cytogenetic risk group – no. (%)</b>      |                     |                      | <b>0.07</b>    |
| <b>Favorable</b>                             | <b>3 (5)</b>        | <b>0 (0)</b>         |                |
| <b>Intermediate</b>                          | <b>39 (59)</b>      | <b>65 (59)</b>       |                |
| <b>Poor</b>                                  | <b>24 (36)</b>      | <b>45 (41)</b>       |                |
| <b>Antecedent hematologic disorder–</b>      | <b>13 (19)</b>      | <b>23 (20)</b>       | <b>1</b>       |
| <b>Complete remission rate – no. (%)</b>     | <b>56 (84)</b>      | <b>78 (69)</b>       | <b>0.03</b>    |
| <b>Overall survival (months)</b>             |                     |                      |                |
| <b>Median</b>                                | <b>79+</b>          | <b>14</b>            | <b>0.0006</b>  |
| <b>(Range)</b>                               | <b>(0-79+)</b>      | <b>(0-82+)</b>       |                |
| <b>Mutations – no. (%)</b>                   |                     |                      |                |
| <b>FLT3-ITD</b>                              | <b>14 (22)</b>      | <b>20 (18)</b>       | <b>0.55</b>    |
| <b>FLT3-TKD</b>                              | <b>3 (5)</b>        | <b>10 (9)</b>        | <b>0.38</b>    |
| <b>RAS</b>                                   | <b>6 (10)</b>       | <b>16 (17)</b>       | <b>0.25</b>    |
| <b>NPM1</b>                                  | <b>16 (28)</b>      | <b>17 (18)</b>       | <b>0.22</b>    |
| <b>IDH1</b>                                  | <b>2 (3)</b>        | <b>6 (5)</b>         | <b>0.71</b>    |
| <b>IDH2</b>                                  | <b>5 (8)</b>        | <b>8 (7)</b>         | <b>1</b>       |
| <b>IDH1/2</b>                                | <b>7 (11)</b>       | <b>13 (12)</b>       | <b>1</b>       |

**DNMT3A** **10 (16)** **10 (9)** **0.22**

---

**\*The P value were computed from Fisher's exact test for two-by-two contingency analyses, Mann-Whitney test to compare continuous variables (Age, Bone marrow blasts at diagnosis, and WBC at diagnosis), and the log-rank test for survival data. All p values were two-tailed and the threshold of statistical significance was  $P < 0.05$ . tet2-DMCs = TET2-specific differentially methylated CpGs.**

**Supplementary Table 3. Patient Characteristics for tet2-DMC-high with and without TET2/IDH mutations\***

| <b>Characteristics</b>                       | <b>With mutations</b> | <b>Without mutations</b> | <b>P value</b> |
|----------------------------------------------|-----------------------|--------------------------|----------------|
| <b>Age, years</b>                            |                       |                          |                |
| <b>Mean</b>                                  | <b>61</b>             | <b>60</b>                | <b>0.52</b>    |
| <b>(Range)</b>                               | <b>(27-77)</b>        | <b>(18-88)</b>           |                |
| <b>Gender:</b>                               |                       |                          |                |
| <b>Male – no. (%)</b>                        | <b>21 (51)</b>        | <b>59 (56)</b>           | <b>0.06</b>    |
| <b>Bone marrow blasts at diagnosis (%)</b>   |                       |                          | <b>0.32</b>    |
| <b>Mean</b>                                  | <b>48</b>             | <b>29</b>                |                |
| <b>(Range)</b>                               | <b>(0-97)</b>         | <b>(0-98)</b>            |                |
| <b>WBC at diagnosis (*10<sup>3</sup>/uL)</b> |                       |                          |                |
| <b>Mean</b>                                  | <b>15</b>             | <b>20</b>                | <b>0.47</b>    |
| <b>(Range)</b>                               | <b>(1-172)</b>        | <b>(1-298)</b>           |                |
| <b>Cytogenetic risk group – no. (%)</b>      |                       |                          | <b>0.36</b>    |
| <b>Favorable</b>                             | <b>0 (0)</b>          | <b>5 (5)</b>             |                |
| <b>Intermediate</b>                          | <b>29 (73)</b>        | <b>70 (67)</b>           |                |
| <b>Poor</b>                                  | <b>11 (27)</b>        | <b>30 (28)</b>           |                |
| <b>Mutations – no. (%)</b>                   |                       |                          |                |
| <b>FLT3-TKD</b>                              | <b>9 (24)</b>         | <b>31 (31)</b>           | <b>0.53</b>    |

|               |                |                |             |
|---------------|----------------|----------------|-------------|
| <b>RAS</b>    | <b>2 (5)</b>   | <b>7 (7)</b>   | <b>1.0</b>  |
| <b>NPM1</b>   | <b>14 (36)</b> | <b>23 (22)</b> | <b>0.13</b> |
| <b>ASXL1</b>  | <b>2 (9)</b>   | <b>1 (3)</b>   | <b>0.55</b> |
| <b>DNMT3A</b> | <b>6 (28)</b>  | <b>11 (33)</b> | <b>0.77</b> |
| <b>CEBPA</b>  | <b>2 (9)</b>   | <b>4 (12)</b>  | <b>1.0</b>  |

---

\*The P value were computed from Fisher's exact test for two-by-two contingency analyses, Mann-Whitney test to compare continuous variables (Age, Bone marrow blasts at diagnosis, and WBC at diagnosis), and the log-rank test for survival data. All p values were two-tailed and the threshold of statistical significance was P<0.05.

tet2-DMCs = TET2-specific differentially methylated CpGs.

**Supplementary Figure 1. Mutation co-occurrence for 186 AML patients. Shown are somatic, nonsynonymous mutations in individual genes and sets of genes. Eighty-one (43%) had at least one mutation in one of the listed genes or sets. The cytogenetic risk for each patient is shown at the bottom of the chart. Blue, Favorable; Green, Intermediate; Red, Poor risk groups.**





**Supplementary Figure 2. Analysis of OS for 186 AML patients. A) Univariate analyses of OS by clinical characteristics. Kaplan-Meier survival curves were drawn for each covariate. Age, cytogenetics, and AHD are associated with OS. P values are derived from the log-rank test. B) Univariate analyses of OS by genetic alterations. Kaplan-Meier survival curves were drawn for each gene. Only NPM1 mutations are associated with longer OS (P=0.01). P values are derived from the log-rank test.**

Supplementary Figure 2

A

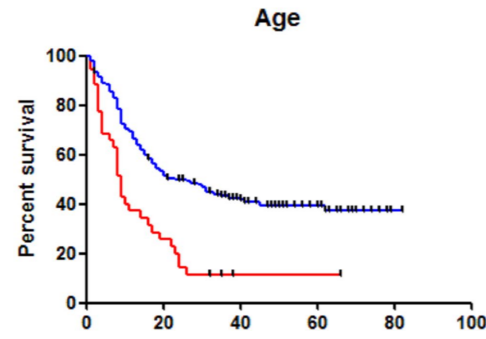

| No. at Risk | Months |    |    |    |
|-------------|--------|----|----|----|
|             | 0      | 20 | 40 | 60 |
| >60         | 35     | 10 | 2  | 2  |
| <60         | 153    | 80 | 54 | 49 |

P<0.0001

Gender

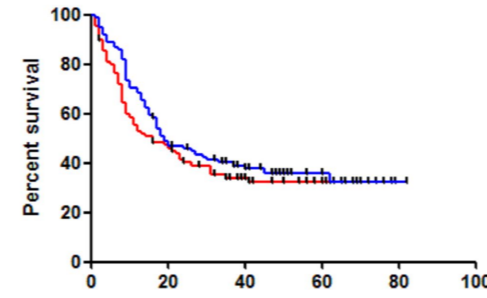

| No. at Risk | Months |    |    |    |
|-------------|--------|----|----|----|
|             | 0      | 20 | 40 | 60 |
| Male        | 90     | 41 | 22 | 10 |
| Female      | 98     | 47 | 28 | 11 |

P=0.30

Cytogenetics

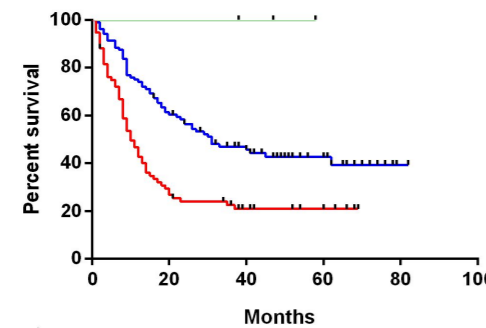

| No. at Risk  | Months |    |    |    |
|--------------|--------|----|----|----|
|              | 0      | 20 | 40 | 60 |
| Favorable    | 3      | 3  | 3  | 3  |
| Intermediate | 104    | 62 | 38 | 8  |
| Poor         | 76     | 22 | 11 | 2  |

P<0.0001

AHD

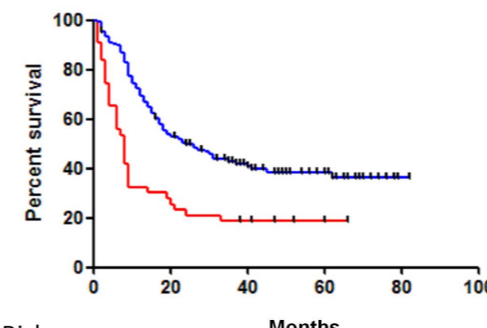

| No. at Risk | Months |    |    |    |
|-------------|--------|----|----|----|
|             | 0      | 20 | 40 | 60 |
| Yes         | 43     | 12 | 8  | 3  |
| No          | 145    | 76 | 43 | 18 |

P<0.0001

BM Blast (%)

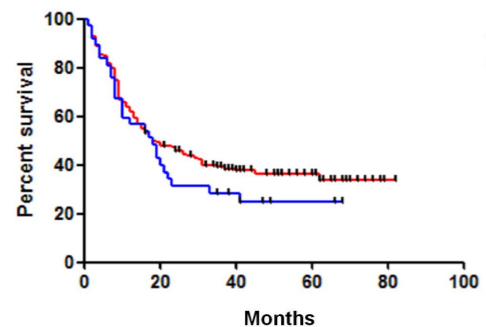

| No. at Risk | Months |    |    |    |
|-------------|--------|----|----|----|
|             | 0      | 20 | 40 | 60 |
| >30%        | 151    | 73 | 42 | 18 |
| <30%        | 37     | 15 | 9  | 4  |

P=0.28

WBC

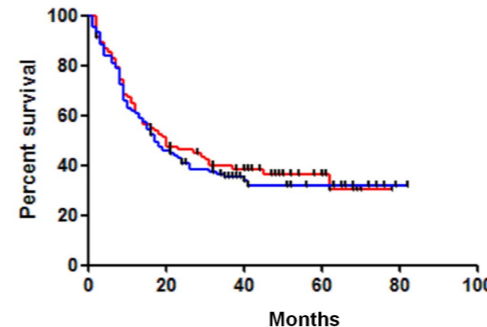

| No. at Risk | Months |    |    |    |
|-------------|--------|----|----|----|
|             | 0      | 20 | 40 | 60 |
| >10,000     | 83     | 41 | 27 | 9  |
| <10,000     | 105    | 49 | 23 | 14 |

P=0.65

B

FLT3-ITD

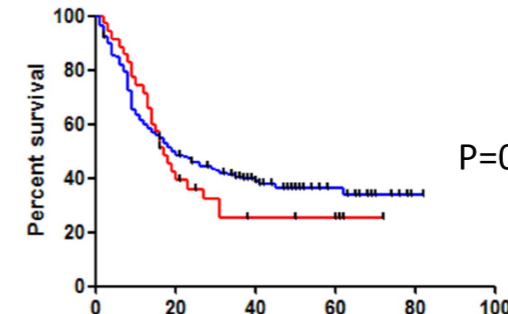

| No. at Risk | Months |    |    |    |
|-------------|--------|----|----|----|
|             | 0      | 20 | 40 | 60 |
| MT          | 35     | 14 | 7  | 5  |
| WT          | 145    | 71 | 43 | 16 |

P=0.50

NPM1

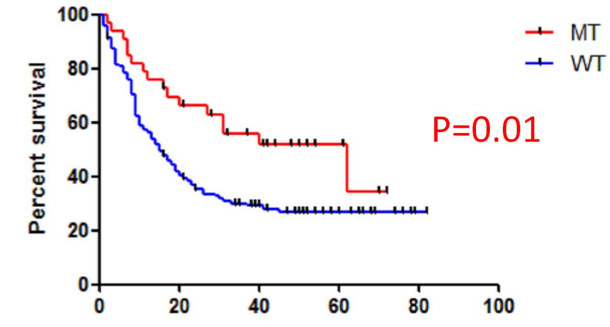

| No. at Risk | Months |    |    |    |
|-------------|--------|----|----|----|
|             | 0      | 20 | 40 | 60 |
| MT          | 33     | 22 | 13 | 5  |
| WT          | 125    | 51 | 30 | 14 |

P=0.01

FLT3-TKD

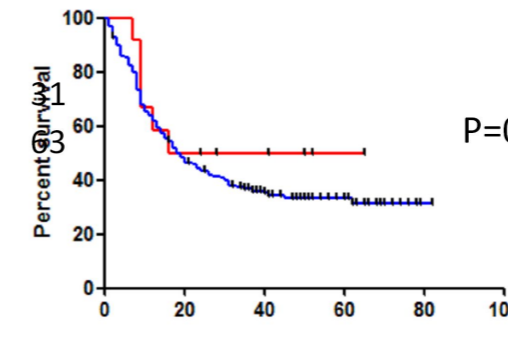

| No. at Risk | Months |    |    |    |
|-------------|--------|----|----|----|
|             | 0      | 20 | 40 | 60 |
| MT          | 12     | 7  | 5  | 2  |
| WT          | 169    | 79 | 45 | 19 |

P=0.40

RAS

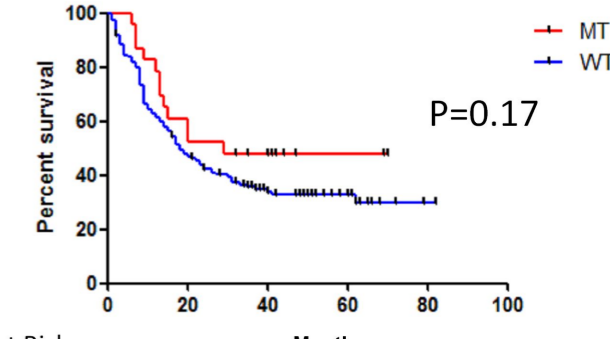

| No. at Risk | Months |    |    |    |
|-------------|--------|----|----|----|
|             | 0      | 20 | 40 | 60 |
| MT          | 23     | 14 | 9  | 2  |
| WT          | 143    | 66 | 35 | 5  |

P=0.17

IDH

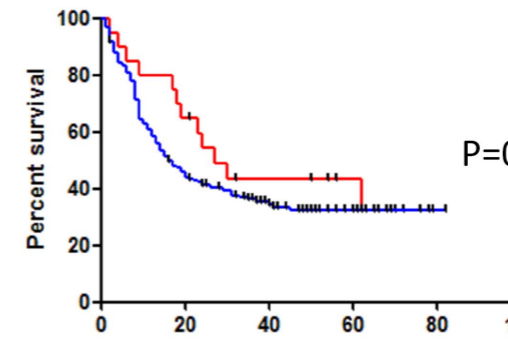

| No. at Risk | Months |    |    |    |
|-------------|--------|----|----|----|
|             | 0      | 20 | 40 | 60 |
| MT          | 20     | 14 | 8  | 5  |
| WT          | 164    | 75 | 41 | 15 |

P=0.30

DNMT3A

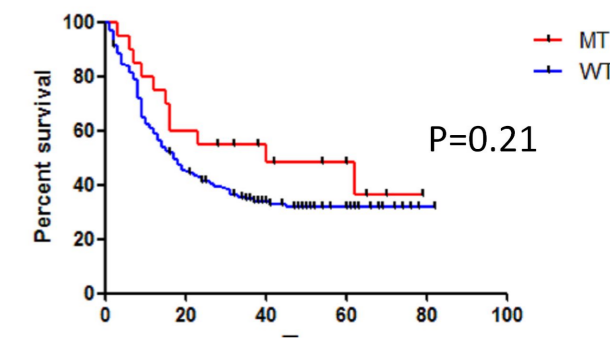

| No. at Risk | Months |    |    |    |
|-------------|--------|----|----|----|
|             | 0      | 20 | 40 | 60 |
| MT          | 20     | 14 | 8  | 5  |
| WT          | 161    | 71 | 39 | 15 |

P=0.21

**Supplementary Figure 3. DNA methylation status of 4 tet2-DMCs (a CpG site close (<50 bp) to the transcription start site of SP140 and CpG sites in gene-bodies of MCCC1, EHMT1, and MTSS1) in AML patients in the test and validation cohorts and normal peripheral blood (NPB) A) Mean  $\pm$  SEM are shown. All 4 loci showed significant hypermethylation in AML compared to NPB. Note that there are some patients with tet2-DMC equal or lower than NPB. Horizontal blue lines represent the thresholds used for the clinically applicable tet2-DMC signature. B) DNA methylation status of 4 tet2-DMCs in CD34+ and 34- cells.**

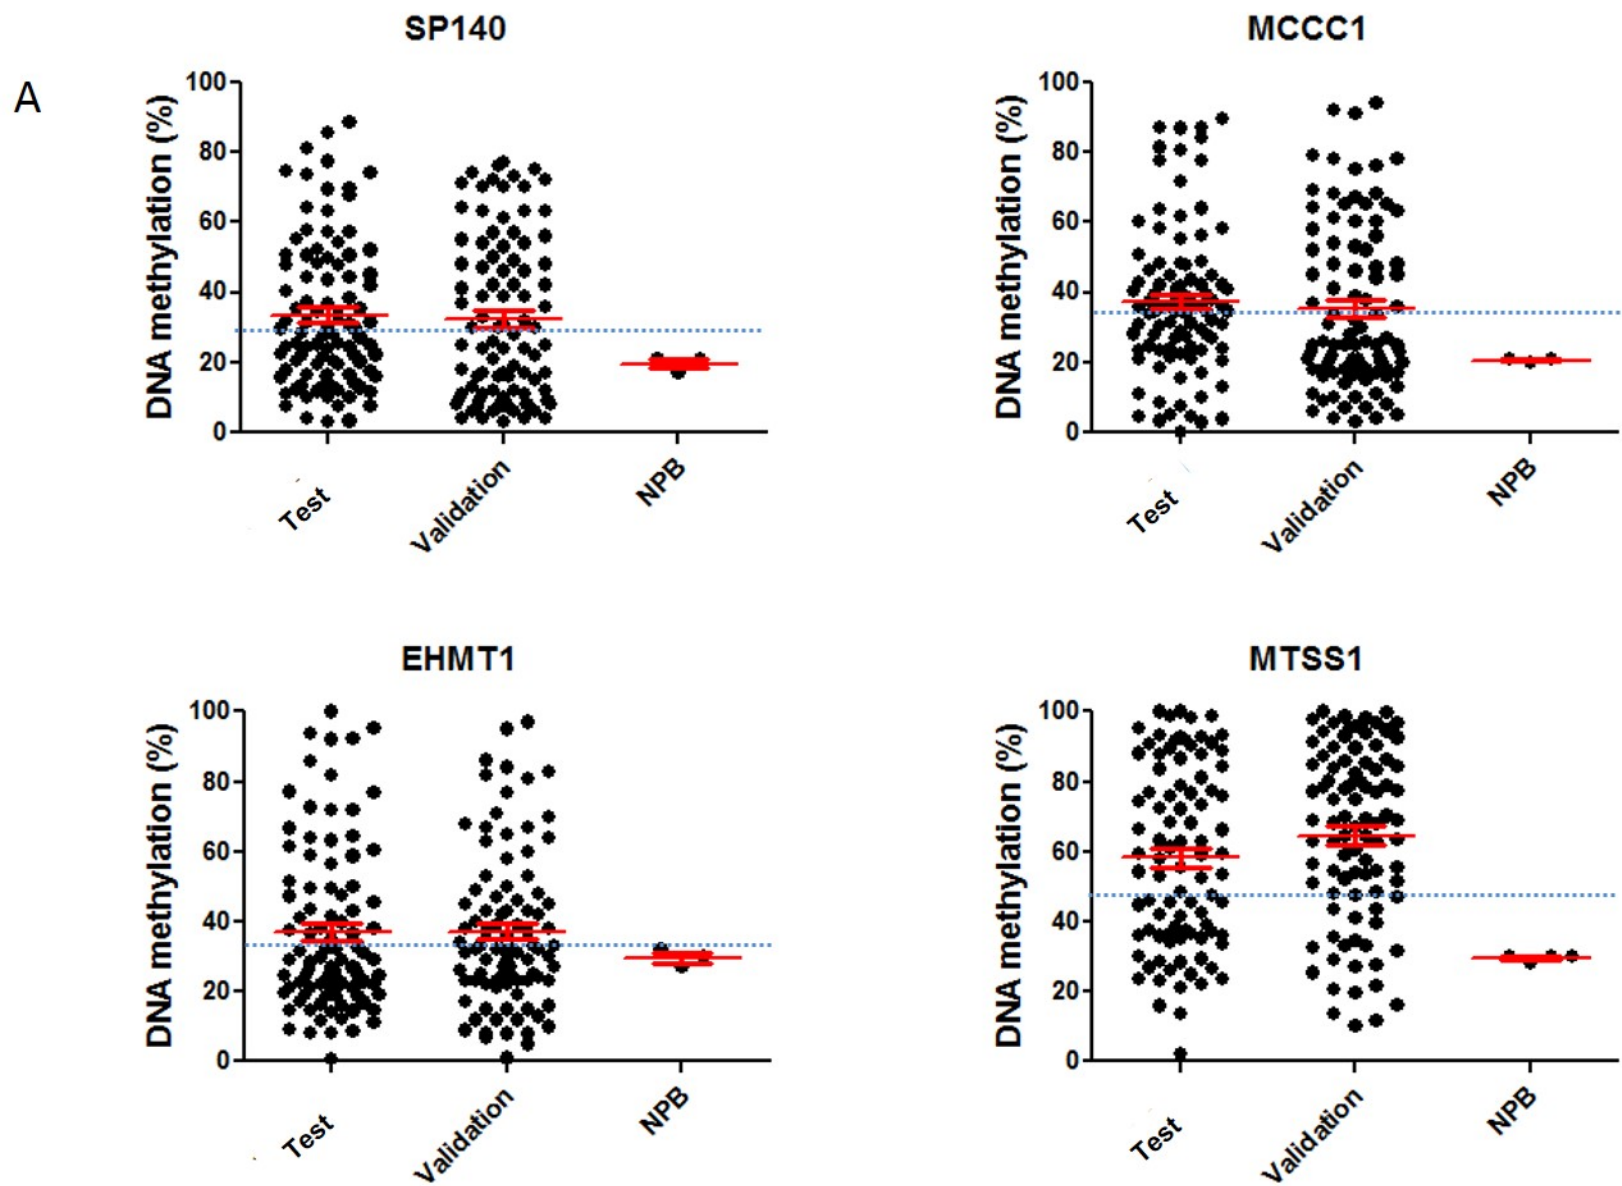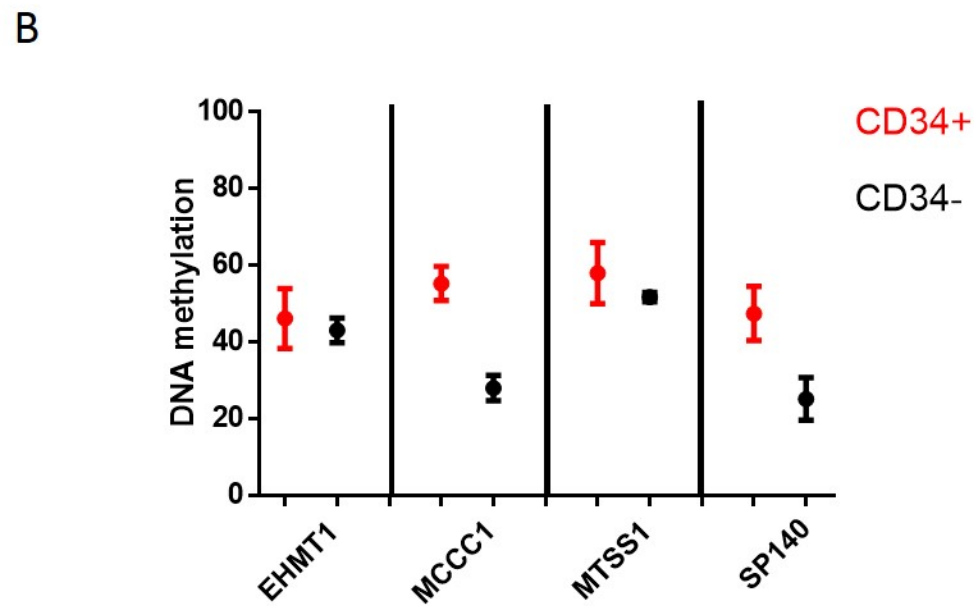

**Supplementary Figure 4. Kaplan-Meier survival curves for patients with NPM1 mutation but no FLT3-ITD (N+F-) compared to other patients in the combined dataset A) and only among diploid patients B) in all patients (A). Kaplan-Meier survival curves for tet2-DMC-low (blue) and -high (red) patients in (N+F-) patients C) and all patients except for (N+F-) patients D) P values are derived from the log-rank test.**

# Supplementary Figure 4

## A

### All patients

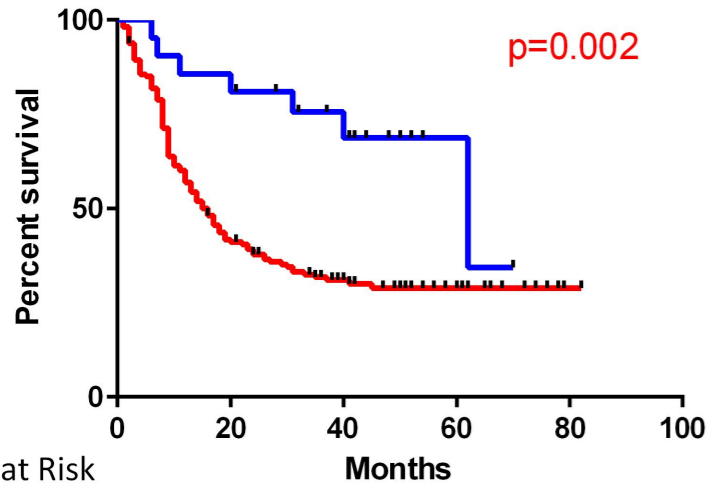

— Mutated NPM1 without FLT3-ITD  
— all others

$p=0.002$

| No. at Risk | 0   | 20 | 40 | 60 | 80 |
|-------------|-----|----|----|----|----|
| —           | 21  | 18 | 11 | 3  | 1  |
| —           | 161 | 65 | 36 | 16 | 2  |

## B

### Diploid

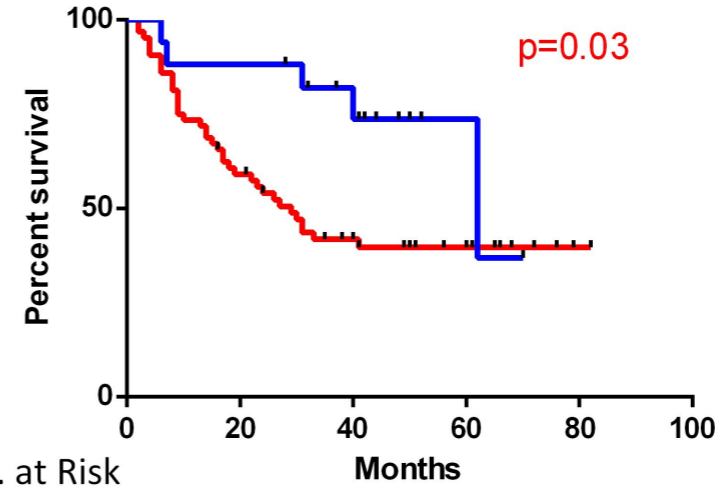

— Mutated NPM1 without FLT3-ITD  
— all others

$p=0.03$

| No. at Risk | 0  | 20 | 40 | 60 | 80 |
|-------------|----|----|----|----|----|
| —           | 17 | 16 | 10 | 3  | 1  |
| —           | 64 | 37 | 21 | 12 | 2  |

## C

### Mutated NPM1 without FLT3-ITD

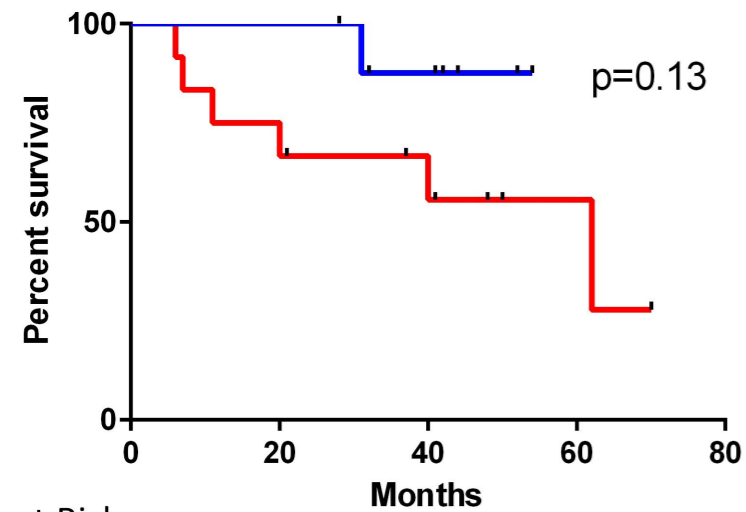

— tet2-DMC-Low  
— tet2-DMC-High

$p=0.13$

| No. at Risk | 0  | 20 | 40 | 60 |
|-------------|----|----|----|----|
| Low         | 9  | 9  | 7  | 1  |
| High        | 12 | 9  | 6  | 2  |

## D

### All patients except for mutated NPM1 without FLT3-ITD

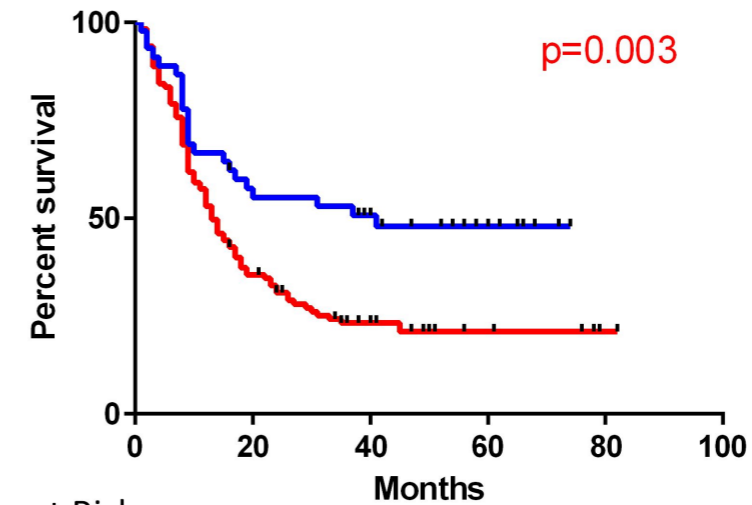

— tet2-DMC-Low  
— tet2-DMC-High

$p=0.003$

| No. at Risk | 0   | 20 | 40 | 60 | 80 |
|-------------|-----|----|----|----|----|
| Low         | 44  | 25 | 19 | 11 | 1  |
| High        | 116 | 42 | 17 | 6  | 2  |

**Supplementary Figure 5. A scheme for a clinically applicable tet2-DMC signature. Upper panel; methylation thresholds for each tet2-DMC to classify AML patients as being called `positive`. Examples of AML patients and the numbers of positives are shown. Lower panel; Kaplan-Meier survival curves for tet2-DMC-low (blue) and –high (red) patients defined by the method above. Tet2-DMC-low patients showed significantly longer OS compared to tet2-DMC-high in the analysis of all patients. P values are derived from the log-rank test.**



Supplementary Figure 5

| tet2-DMRs          | Thresholds | AML 1 | AML 2 | AML3 | AML 4 | AML 5 | ..... |
|--------------------|------------|-------|-------|------|-------|-------|-------|
| SP140              | 31.5%      | 70%   | 47%   | 8%   | 18%   | 61%   |       |
| MCCC1              | 38.0%      | 68%   | 25%   | 7%   | 26%   | 65%   |       |
| EHMT1              | 32.3%      | 8%    | 27%   | 26%  | 67%   | 71%   |       |
| MTSS1              | 42.4%      | 95%   | 25%   | 32%  | 94%   | 86%   |       |
| Number of Positive |            | 3     | 1     | 0    | 2     | 4     |       |

tet2-DMC-Low: 0-1 genes

tet2-DMC-High: 2-4 genes

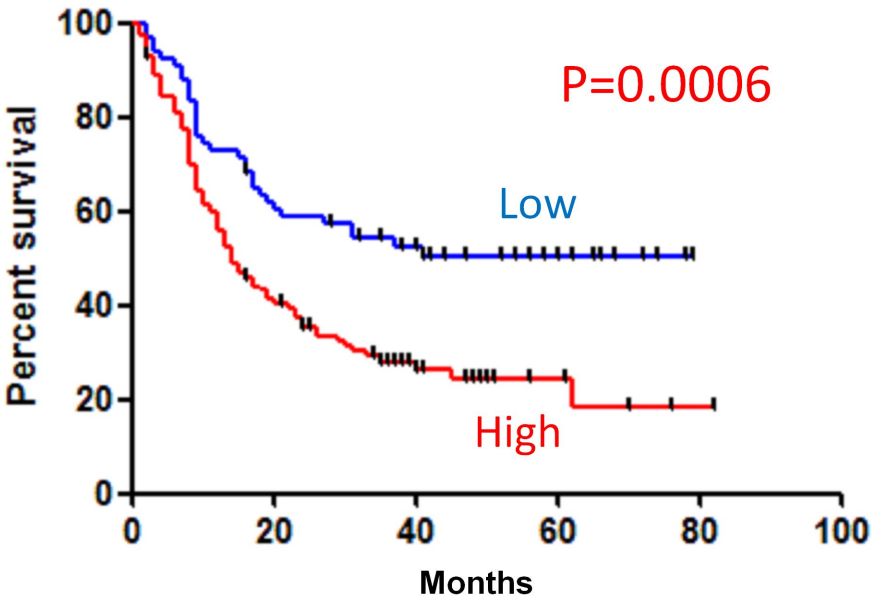

No. at Risk

|      |     |    |    |    |   |
|------|-----|----|----|----|---|
| Low  | 66  | 40 | 28 | 13 | 1 |
| High | 110 | 44 | 19 | 6  | 2 |

**Supplementary Figure 6. Additive effects between tet2-DMC-low and M3/favorable-risk cytogenetic group. A) Kaplan-Meier survival curves in the TCGA dataset for M3/favorable-risk cytogenetic group. The patients are subdivided by tet2-DMC status. B) Kaplan-Meier survival curves in the TCGA dataset for tet2-DMC-low patients. The patients are subdivided by status of M3/favorable-risk cytogenetic group. C) Kaplan-Meier survival curves in the TCGA dataset for intermediate and poor cytogenetic group. The patients are subdivided by tet2-DMC status. P values are derived from the log-rank test.**

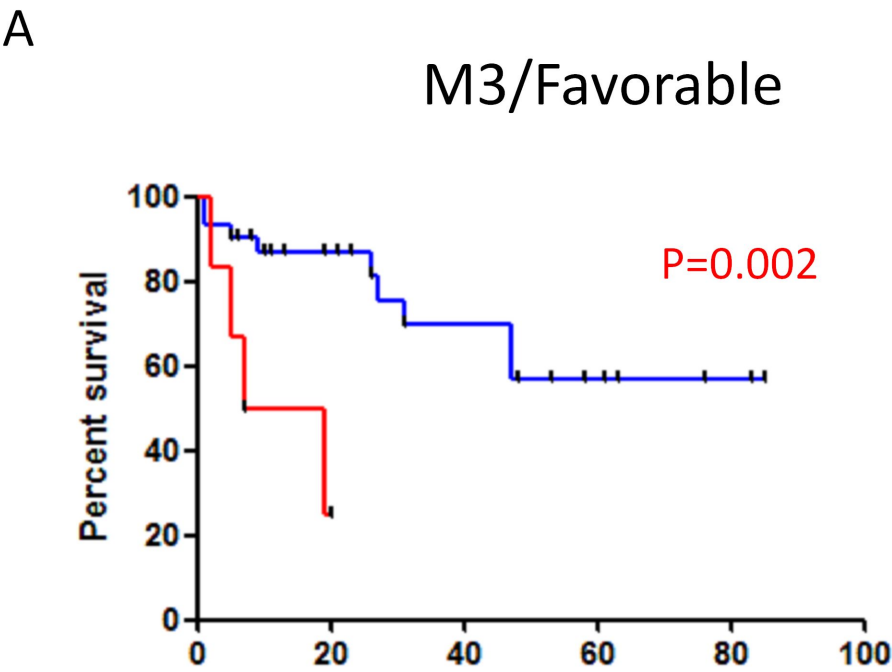

No. at Risk

|      | 0  | 20 | 40 | 60 |
|------|----|----|----|----|
| Low  | 31 | 20 | 13 | 6  |
| High | 6  | 1  | 1  | 1  |

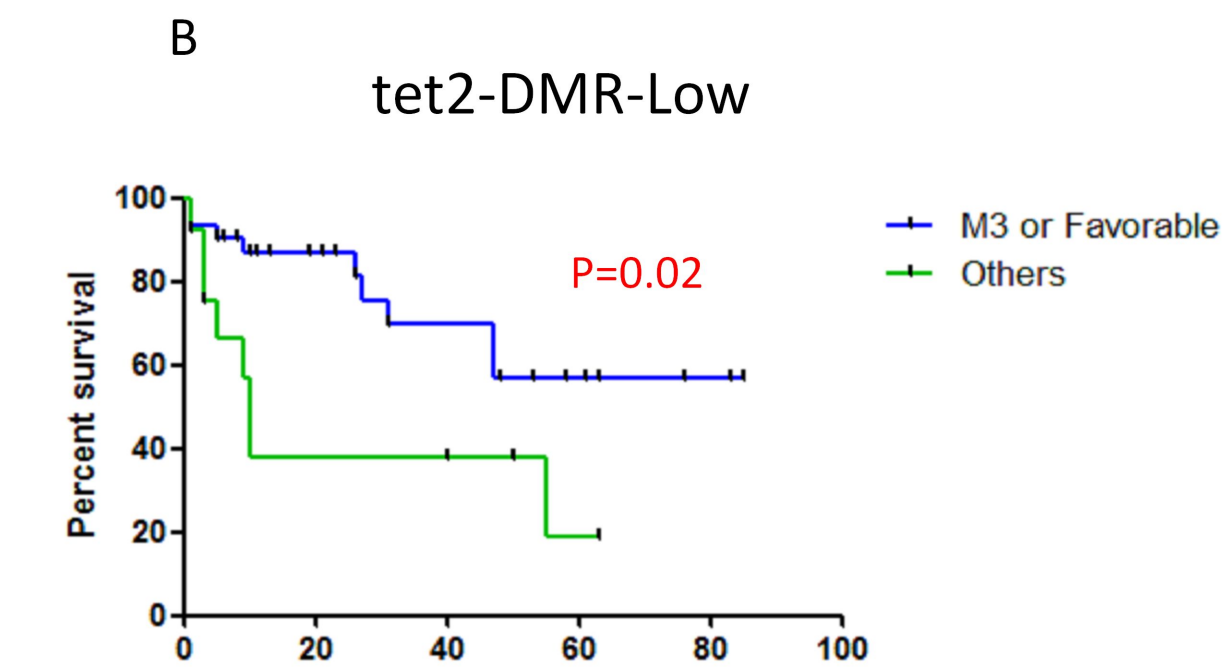

No. at Risk

|                 | 0  | 20 | 40 | 60 |
|-----------------|----|----|----|----|
| M3 or Favorable | 31 | 20 | 13 | 6  |
| Others          | 13 | 6  | 4  | 2  |

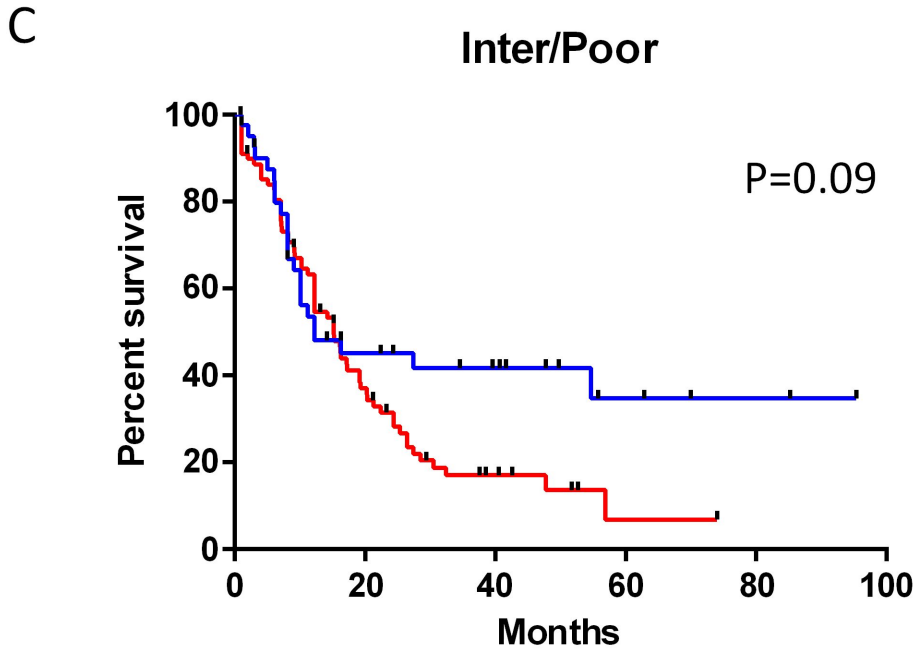

No. at Risk

|      | 0  | 20 | 40 | 60 |
|------|----|----|----|----|
| Low  | 42 | 16 | 11 | 5  |
| High | 90 | 26 | 9  | 2  |
